# Supplementary material for: Meta-analysis of association between TCF7L2 polymorphism rs7903146 and type 2 diabetes mellitus
Source: BMC Med Genet. 2018 Mar 7;19:38. doi: 10.1186/s12881-018-0553-5 (PMC5842570; doi:10.1186/s12881-018-0553-5)
Supplement: Supplementary file 1 — Table S1. The detailed information about the search strategy. Table S2. The collected data in the meta-analysis. (XLSX 13 kb) [file 12881_2018_553_MOESM1_ESM.xlsx]

## Sheet: Table S1
Table S1. The collected data was performed with the R package 'meta'.
Study	Year	Population	D.CC	D.CT	D.TT	D.D	D.R	D.A	D.T	D.C	T.CC	T.CT	T.TT	T.D	T.R	T.A	T.T	T.C	Subgroup
Saadi et al.	2008	Arab	30	54	11	65	84	41	76	114	101	148	34	182	249	135	216	350	Arab
Alsmadi et al.	2008	Arab	179	253	90	343	432	269	433	611	304	415	149	564	719	453	713	1023	Arab
InaDanquah et al.	2013	Ghanaian	273	323	78	401	596	351	479	869	455	488	106	594	943	561	700	1398	Black African
Yan et al.	2009	African American	255	212	48	260	467	303	308	722	1411	1133	213	1346	2544	1624	1559	3955	Black African
Humphries et al.	2006	Afro-Caribbean	141	136	30	166	277	171	196	418	302	260	56	316	562	358	372	864	Black African
Vcelak et al.	2012	Czech	148	156	43	199	304	191	242	452	353	303	67	370	656	420	437	1009	Caucasian
Yan et al.	2009	Caucasian	430	392	101	493	822	531	594	1252	4725	3783	794	4577	8508	5519	5371	13233	Caucasian
Dahlgren et al.	2008	Swedish	67	83	18	101	150	85	119	217	563	410	80	490	973	643	570	1536	Caucasian
Silva et al.	2007	English	420	507	161	668	927	581	829	1347	1452	1394	341	1735	2846	1793	2076	4298	Caucasian
Kimber et al.	2007	English	1405	1459	361	1820	2864	1766	2181	4269	3119	2788	609	3397	5907	3728	4006	9026	Caucasian
Mayans et al.	2007	Swedish	452	318	54	372	770	506	426	1222	984	571	89	660	1555	1073	749	2539	Caucasian
Ostaptchouk et al.	2007	Dutch	203	221	72	293	424	275	365	627	662	586	155	741	1248	817	896	1910	Caucasian
Cauchi et al.	2006	Austrian	200	208	78	286	408	278	364	608	755	640	166	806	1395	921	972	2150	Caucasian
Groves et al.	2006	English	771	960	270	1230	1731	1041	1500	2502	1946	2044	487	2531	3990	2433	3018	5936	Caucasian
Humphries et al.	2006	European	601	665	193	858	1266	794	1051	1867	1896	1666	390	2056	3562	2286	2446	5458	Caucasian
Zheng et al.	2011	Chinese	202	24	1	25	226	203	26	428	341	37	1	38	378	342	39	719	East Asian
Yasuharu et al.	2009	Japanese	434	45	2	47	479	436	49	913	806	71	2	73	877	808	75	1683	East Asian
Miyake et al.	2008	Japanese	1921	228	5	233	2149	1926	238	4070	3617	365	6	371	3982	3623	377	7599	East Asian
Horikoshi et al.	2007	Japanese	165	22	2	24	187	167	26	352	416	43	2	45	459	418	47	875	East Asian
Hayashi et al.	2007	Japanese	1450	165	4	169	1615	1454	173	3065	2430	250	6	256	2680	2436	262	5110	East Asian
Assmann et al.	2014	Brazilian	382	415	156	571	797	538	727	1179	643	630	215	845	1273	858	1060	1916	Brazilian
Barra et al.	2012	Brazilian	49	47	17	64	96	66	81	145	119	110	23	133	229	142	156	348	Brazilian
Marquezine et al.	2007	Brazilian	45	54	13	67	99	58	80	144	609	657	141	798	1266	750	939	1875	Brazilian
Hussain et al.	2014	Indian	25	36	7	43	61	32	50	86	68	71	11	82	139	79	93	207	South Asian
Gupta et al.	2010	Indian	55	96	44	140	151	99	184	206	117	174	65	239	291	182	304	408	South Asian
Rees et al.	2008	UK South Asian	352	360	116	476	712	468	592	1064	574	526	160	686	1100	734	846	1674	South Asian
Bodhini et al.	2007	UK Asian Indian	462	455	114	569	917	576	683	1379	1017	846	206	1052	1863	1223	1258	2880	South Asian
Chandak et al.	2007	Indian	391	423	141	564	814	532	705	1205	596	583	175	758	1179	771	933	1775	South Asian

## Sheet: Table S2
Tale S2. The specific reasons of the exclusion studies.
No. of the articles	Reason
355	They were searched and collected by using the keywords "rs7903146 " and "type 2 diabetes mellitus".
230	According to the title and abstract.
45	The studies did not use the case-control method.
26	The studies did not have su_x000E_cient data to calculate OR.
10	They did not evaluate the association between rs7903146 and T2DM.
4	Some LADA or type 1 diabetes patients were included in the case groups.
5	The studies in the control group did not meet the HWE.
9	The articles were removed as they increased the heterogeneity.
26	The total remained articles.
